# Supplementary material
Source: PubMed Central journal article supplement (PMC6706310)
Supplement: NIHMS1530977-supplement-3.pdf [file NIHMS1530977-supplement-3.pdf]

# Figure S1

**A** 6wpc AAV-PLAP  
Tuj1

$Opn4^{Cre/+};R26-tdTomato^{ff}$

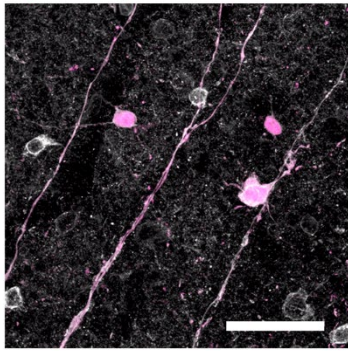

**B** 6wpc AAV-CNTF  
Tuj1

$Opn4^{Cre/+};R26-tdTomato^{ff}$

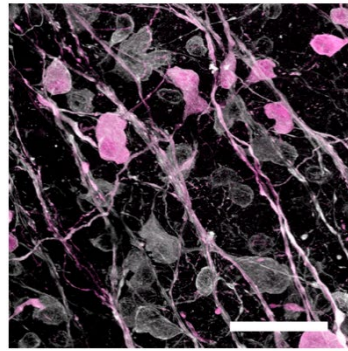

**D** 6wpc AAV-PLAP  
Tuj1

$Opn4^{CreERT/+};R26-tdTomato^{ff}$

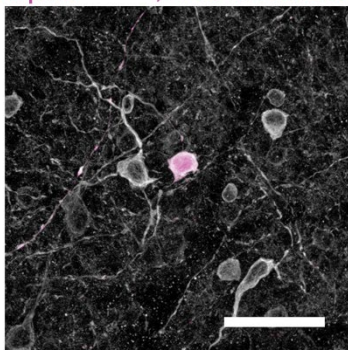

**E** 6wpc AAV-CNTF  
Tuj1

$Opn4^{CreERT/+};R26-tdTomato^{ff}$

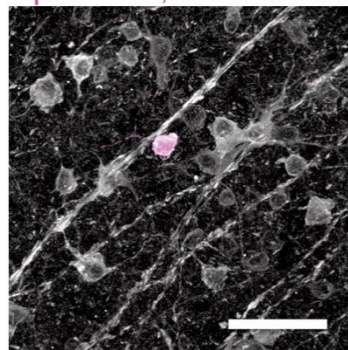

**C**

$Opn4^{Cre/+};R26-tdTomato^{ff}$   
6 weeks post crush

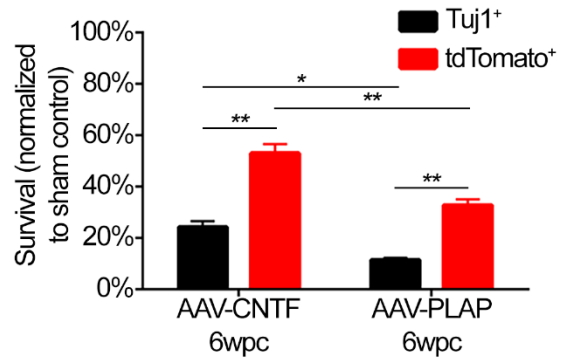

**F**

$Opn4^{CreERT/+};R26-tdTomato^{ff}$   
6 weeks post crush

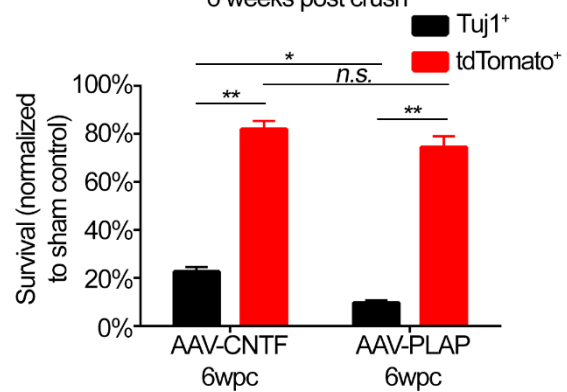

**G**  $Opn4^{Cre/+};R26-tdTomato^{ff}$  6 weeks post crush

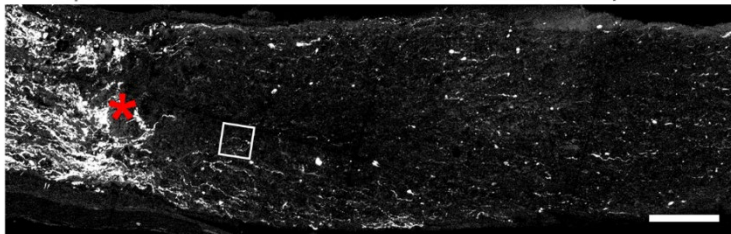

**J**  $Opn4^{CreERT/+};R26-tdTomato^{ff}$  6 weeks post crush

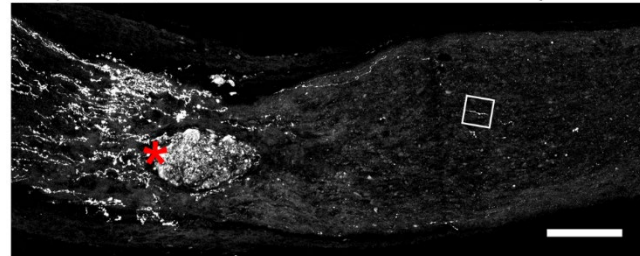

**H** CTB  $Opn4^{Cre/+};R26-tdTomato^{ff}$

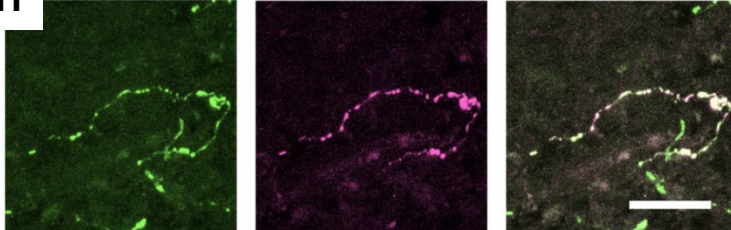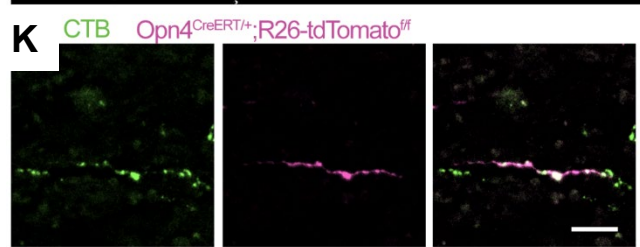

**I**  $Opn4^{Cre/+};R26-tdTomato^{ff}$

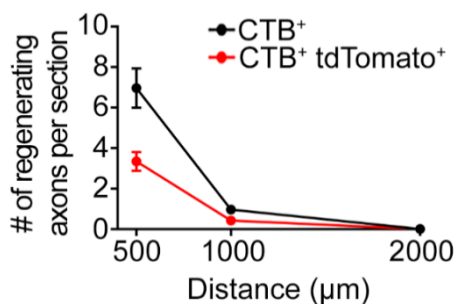

**L**  $Opn4^{CreERT/+};R26-tdTomato^{ff}$

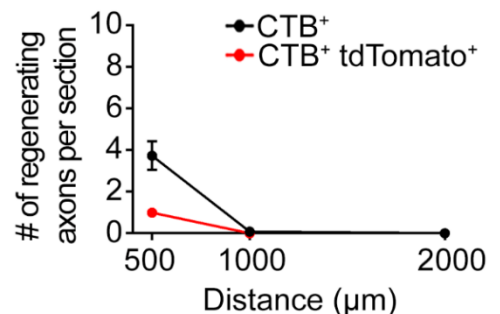

**Supplementary Figure 1 (Related to Figure 1): RGCs labelled in  $Opn4^{Cre/+};R26-tdTomato^{ff}$  and  $Opn4^{CreERT/+};R26-tdTomato^{ff}$  mice have high survival following optic nerve crush, and ipRGCs can spontaneously regenerate axons following optic nerve crush. (A, B, D and E)** Images of retinal whole mounts showing Tuj1-labeled RGCs (grey) and tdTomato-labeled ipRGCs (magenta) (A-B)  $Opn4^{Cre/+};R26-tdTomato^{ff}$  or (D-E)  $Opn4^{CreERT/+};R26-tdTomato^{ff}$ . (A and D) AAV-PLAP injected 6 weeks post crush. (B and E) AAV-CNTF injected 6 weeks post crush. Scale bars, 50  $\mu$ m. **(C)** Quantification of RGC survival for (A and B). Percentage of Tuj1<sup>+</sup> or tdTomato<sup>+</sup> RGCs in each line normalized to the Sham uninjured retina. **(F)** Quantification of RGC survival for (D and E). \*\*  $p < 0.01$ , \*  $p < 0.05$ , n.s.  $p \geq 0.05$ , ANOVA, Tukey's post-hoc test. (C)  $Opn4^{Cre/+};R26-tdTomato^{ff}$ .  $n=8$  for AAV-CNTF, 6 for AAV-PLAP; (F)  $Opn4^{Cre/+};R26-tdTomato^{ff}$   $n=8$  for AAV-CNTF, 7 for AAV-PLAP. Error bars, SEM.

**(G)** Optic nerve showing tdTomato-labeled axons (grey) in AAV-PLAP injected  $Opn4^{Cre/+};R26-tdTomato^{ff}$  6 weeks following crush. Scale bar, 100  $\mu$ m. **(H)** High-magnification image of the boxed areas in (G). CTB (green), tdTomato (magenta) and merge. Scale bar, 10  $\mu$ m. **(I)** Quantification of axon regeneration for (G) showing the number of CTB<sup>+</sup> or CTB<sup>+</sup> tdTomato<sup>+</sup> axons at each distance. **(J)** Optic nerve showing tdTomato-labeled axons (grey) in AAV-PLAP injected  $Opn4^{CreERT/+};R26-tdTomato^{ff}$  mice 6 weeks following crush. Scale bar, 100  $\mu$ m. **(K)** High-magnification image of the boxed areas in (J). CTB (green), tdTomato (magenta) and merge. Scale bar, 10  $\mu$ m. **(L)** Quantification of axon regeneration for (J) showing the number of CTB<sup>+</sup> or CTB<sup>+</sup> tdTomato<sup>+</sup> axons at each distance.  $n=6$  for  $Opn4^{Cre/+};R26-tdTomato^{ff}$ , 7 for  $Opn4^{CreERT/+};R26-tdTomato^{ff}$ . Error bars, SEM.



## Figure S2

A Sham (Uninjured)

$Opn4^{Cre/+}$ ;  
 $R26-tdTomato^{ff}$   
(Opn4-het) Tuj1

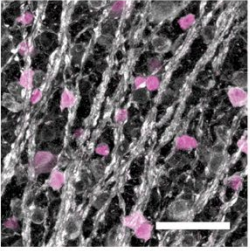

C Sham (Uninjured)

$Opn4^{Cre/Cre-}$ ;  
 $R26-tdTomato^{ff}$   
(Opn4-KO) Tuj1

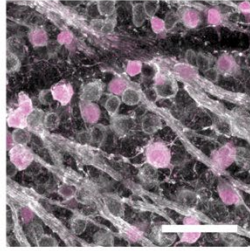

B 3wpc AAV-CNTF

$Opn4^{Cre/+}$ ;  
 $R26-tdTomato^{ff}$   
(Opn4-het) Tuj1

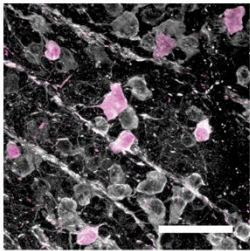

D 3wpc AAV-CNTF

$Opn4^{Cre/Cre-}$ ;  
 $R26-tdTomato^{ff}$   
(Opn4-KO) Tuj1

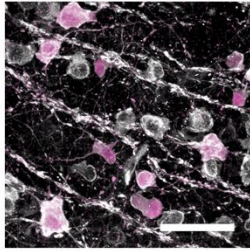

E

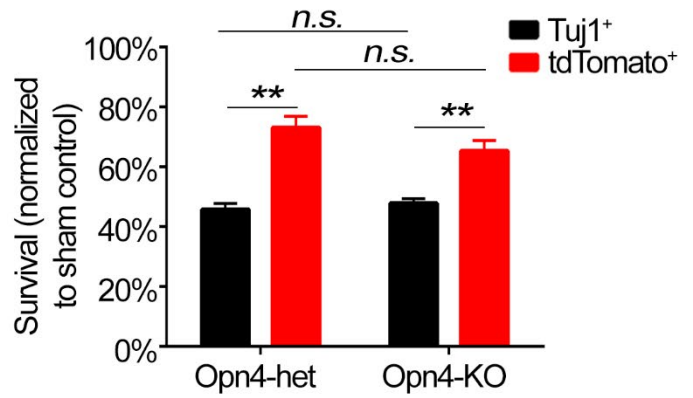

F Sham (Uninjured)

$Opn4^{CreERT/+}$ ;  
 $R26-tdTomato^{ff}$   
(wt) Tuj1

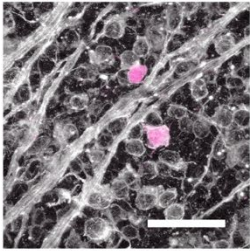

H Sham (Uninjured)

$Opn4^{CreERT/+}$ ;  
 $Igf1^{ff}; R26-tdTomato^{ff}$   
(Igf1-KO) Tuj1

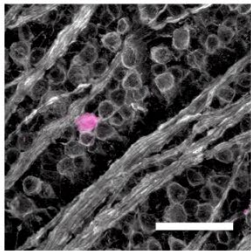

J Sham (Uninjured)

$Opn4^{CreERT/+}$ ;  
 $Tbr2^{ff}; R26-tdTomato^{ff}$   
(Tbr2-KO) Tuj1

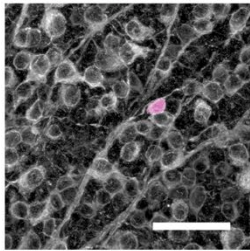

G 3wpc AAV-CNTF

$Opn4^{CreERT/+}$ ;  
 $R26-tdTomato^{ff}$   
(wt) Tuj1

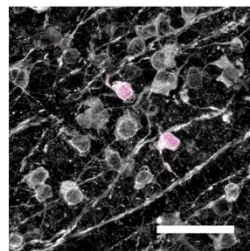

I 3wpc AAV-CNTF

$Opn4^{CreERT/+}$ ;  
 $Igf1^{ff}; R26-tdTomato^{ff}$   
(Igf1-KO) Tuj1

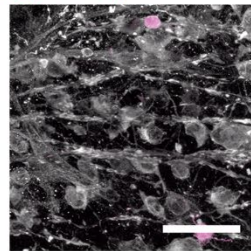

K 3wpc AAV-CNTF

$Opn4^{CreERT/+}$ ;  
 $Tbr2^{ff}; R26-tdTomato^{ff}$   
(Tbr2-KO) Tuj1

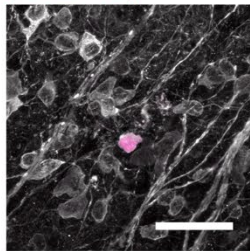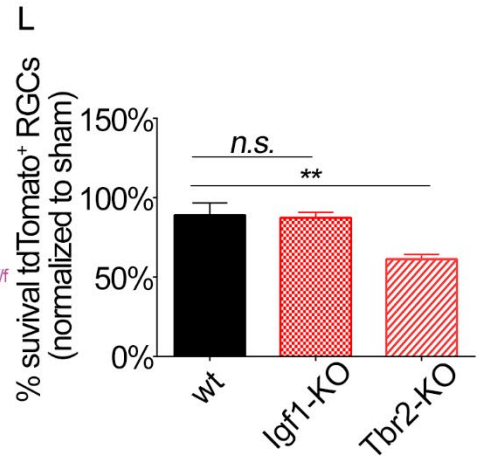

**Supplementary Figure 2 (Related to Figure 3): Opn4, Igf1, Tbr2 knock-out retinas and RGC survival. (A-D)** Retinal whole mounts showing Tuj1-labeled RGCs (grey) and tdTomato-labeled ipRGCs (magenta) (A and B)  $Opn4^{Cre/+};R26-tdTomato^{f/f}$  (Opn4-het) or (C and D)  $Opn4^{Cre/Cre};R26-tdTomato^{f/f}$  (Opn4-KO). (A and C) Sham (uninjured). (B and D) AAV-CNTF and 3 weeks post crush. Scale bars, 50  $\mu$ m. **(E)** Quantification of RGC survival for (A-D). Percentage of Tuj1<sup>+</sup> and Tuj1<sup>+</sup>tdTomato<sup>+</sup> neurons in injured retina normalized to the sham retinas in the Opn4-het and Opn4-KO mice. *ANOVA with Tukey's post-hoc* \*\*  $p \leq 0.01$ . **(F-K)** Retinal whole mounts showing Tuj1-labeled RGCs (grey) and tdTomato-labeled ipRGCs (magenta) of (F and G)  $Opn4^{CreERT/+};R26-tdTomato^{f/f}$  (wt), (H and I)  $Opn4^{CreERT/+};Igf1^{f/f};R26-tdTomato^{f/f}$  (Igf1-KO) and (J and K)  $Opn4^{CreERT/+};Tbr2^{f/f};R26-tdTomato^{f/f}$  (Tbr2-KO). (F, H and J) Sham (uninjured). (G, I and K) AAV-CNTF and 3 weeks post crush. Scale bars, 50  $\mu$ m. **(L)** Quantification of RGC survival for (F-K). \*\*  $p < 0.01$ , *n.s.*  $p \geq 0.05$ , *ANOVA, Bonferroni's post hoc vs wt.*  $n=8$  for  $Opn4^{CreERT/+};R26-tdTomato^{f/f}$ , 6 for  $Opn4^{CreERT/+};Igf1^{f/f};R26-tdTomato^{f/f}$ , 7 for  $Opn4^{CreERT/+};Tbr2^{f/f};R26-tdTomato^{f/f}$ . Error bars, SEM.



# Figure S3

A

CTB HB9:GFP;Bax<sup>-/-</sup> 2wpc

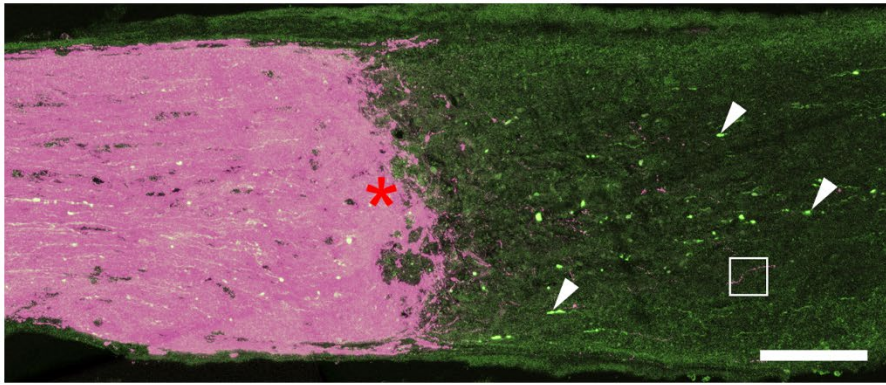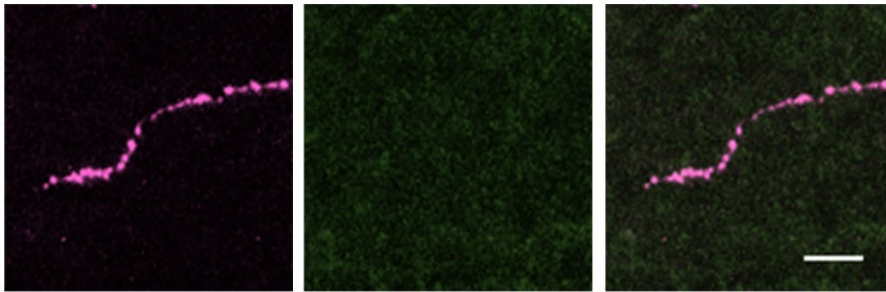

B

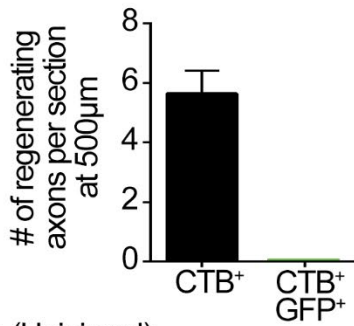

E

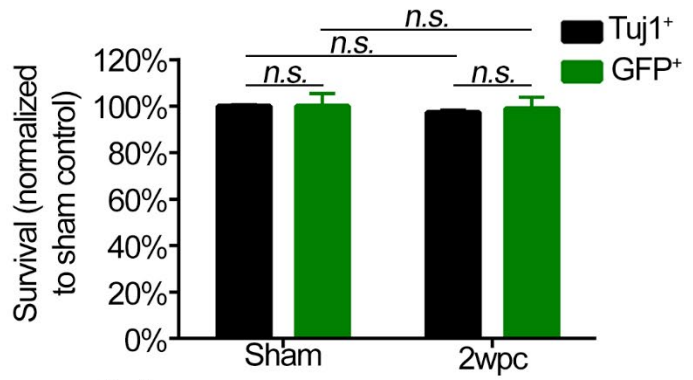

F Sham (Uninjured)

CART HB9:GFP;Bax<sup>-/-</sup>

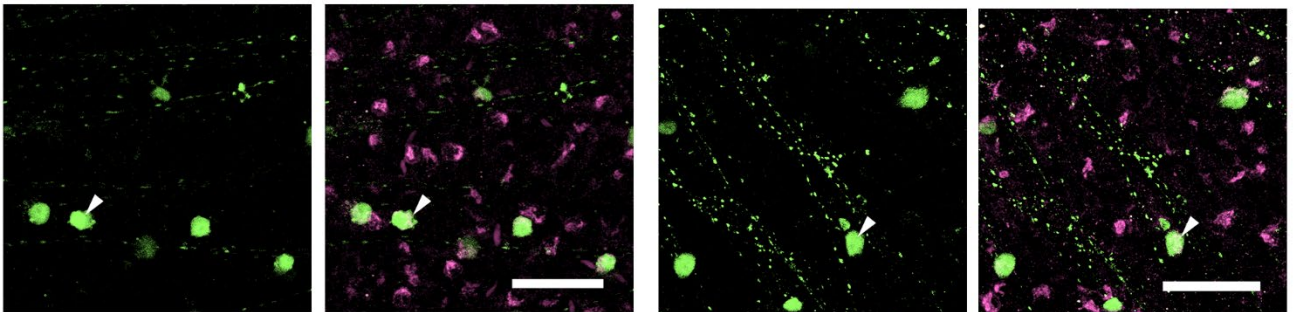

C Sham (Uninjured)

Tuj1 HB9:GFP;Bax<sup>-/-</sup>

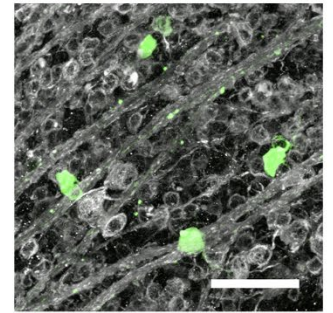

D 2wpc

Tuj1 HB9:GFP;Bax<sup>-/-</sup>

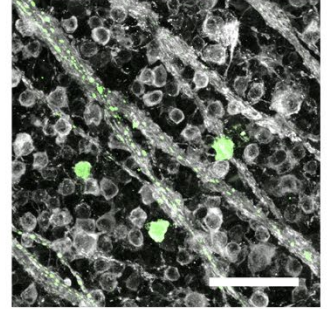

G 2wpc

CART HB9:GFP;Bax<sup>-/-</sup>

**Supplementary Figure 3 (Related to Figure 4): *Opn4*<sup>CreERT/+</sup>;*R26-tdTomato*<sup>f/f</sup> RGCs are, but *HB9:GFP* RGCs are not capable of spontaneous axon regeneration following optic nerve crush even under *Bax* KO background. (A)** Image of an optic nerve section showing CTB-labeled axons (magenta) and GFP-labeled *HB9:GFP;Bax*<sup>-/-</sup> axons (green) 2 weeks post crush. Arrow heads, examples of distal degenerating (CTB-negative) axon fragments. Asterisks, lesion site. Scale bars, 100  $\mu$ m. Insets below, high-magnification of the boxed area in (A) showing CTB (magenta), GFP (green), and merge. Scale bar, 10  $\mu$ m. **(B)** Quantification of axon regeneration for (A). The number of CTB<sup>+</sup> and CTB<sup>+</sup> GFP<sup>+</sup> axons at 500  $\mu$ m distal to the lesion site. Error bars, SEM. **(C and D)** Images of retinal whole mounts showing Tuj1-labeled RGCs (grey) and GFP-labeled *HB9:GFP;Bax*<sup>-/-</sup> RGCs (green). (C) Sham (uninjured). (D) 2 weeks post optic nerve crush. Scale bars, 50  $\mu$ m. **(E)** Quantification of RGC survival for (C and D). Percentage of Tuj1<sup>+</sup> or GFP<sup>+</sup> RGCs in *HB9:GFP;Bax*<sup>-/-</sup> mice normalized to the sham retinas. *n.s.*  $p \geq 0.05$ , ANOVA, Tukey's *post-hoc* test. Error bars, SEM.  $n=3$  per condition. **(F and G)** Images of retinal whole mounts showing CART-labeled ooDSGCs (magenta) and GFP-labeled *HB9:GFP;Bax*<sup>-/-</sup> RGCs (green). Arrow heads show cells with co-localization. (F) Sham (uninjured). (G) 2 weeks post optic nerve crush. Scale bars, 50  $\mu$ m.

**Figure S4**

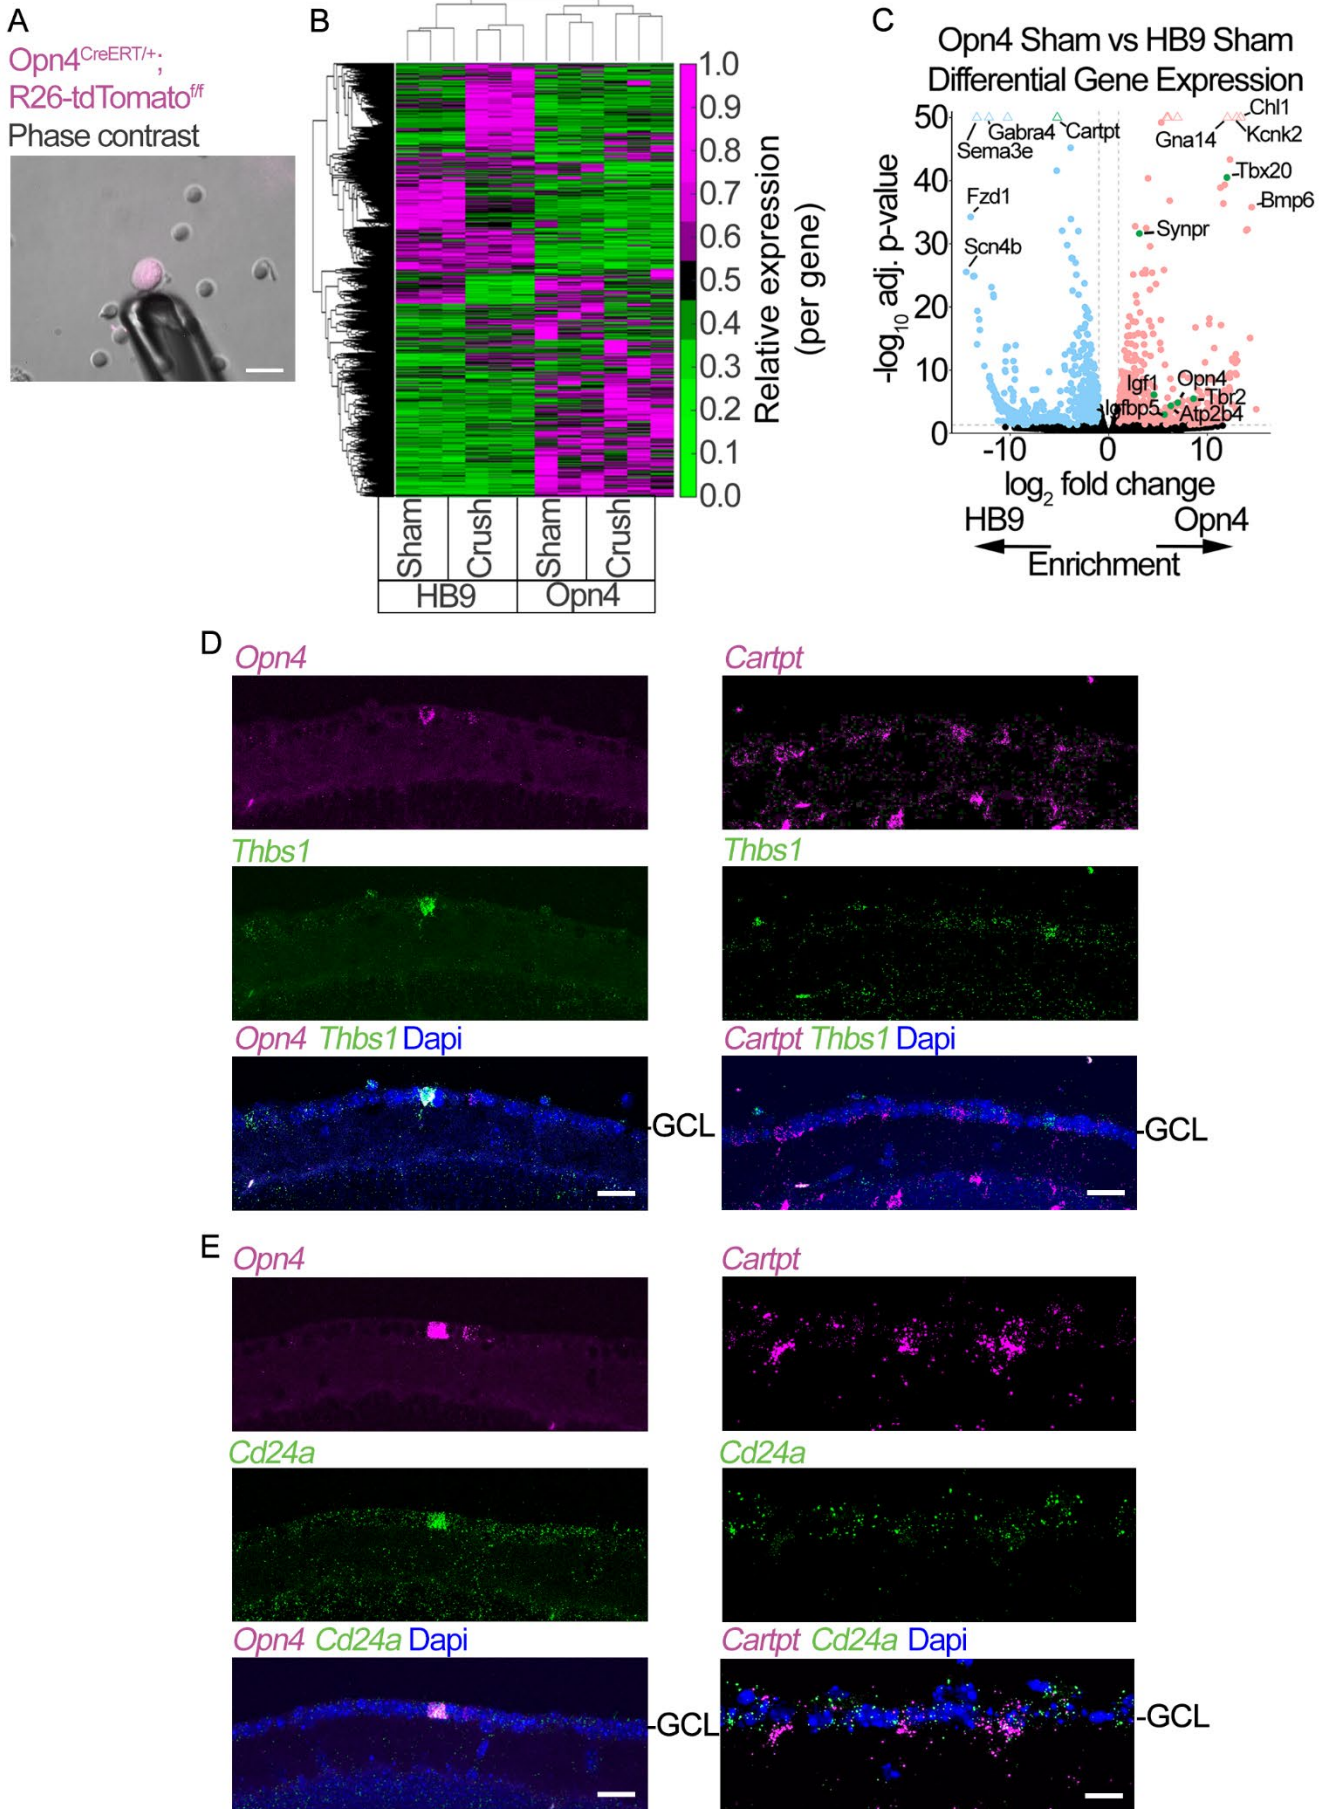

**Supplementary Figure 4 (Related to Figure 4): RNA-seq performed in isolated Opn4 and HB9 RGCs, and fluorescent in situ hybridization (FISH) validation. (A)** Example of a tdTomato-labeled (magenta) RGC being manually collected. Scale bar, 20  $\mu\text{m}$ . **(B)** Hierarchical clustering of RNA-seq samples, showing normalized expression of each gene. **(C)** Volcano plot showing differential gene expression between uninjured Opn4 and HB9 RGCs. Positive  $\log_2\text{FC}$  indicates higher expression in Opn4 RGCs relative to HB9 RGCs. Genes are considered significantly different if expression  $\pm 1 \log_2\text{FC}$  and *adjusted (adj) p-value*  $\leq 0.05$ , vertical and horizontal reference lines at respective values. Triangles indicate genes with an *adj p-value*  $< 1*10^{-50}$ , these values were fixed at  $1*10^{-50}$ . Green points indicate that a gene is a known marker of the RGC subtypes. **(D and E)** FISH validation in vivo. **(D)** Retina sections 3 days post crush, probed for *Opn4* (magenta) or *Cartpt* (magenta) and *Thbs1* (green). Dapi in blue. **(E)** Retina sections 3 days post crush, probed for *Opn4* (magenta) or *Cartpt* (magenta) and *cd24a* (green). Dapi in blue. Scale bar, 25  $\mu\text{m}$ .



# Figure S5

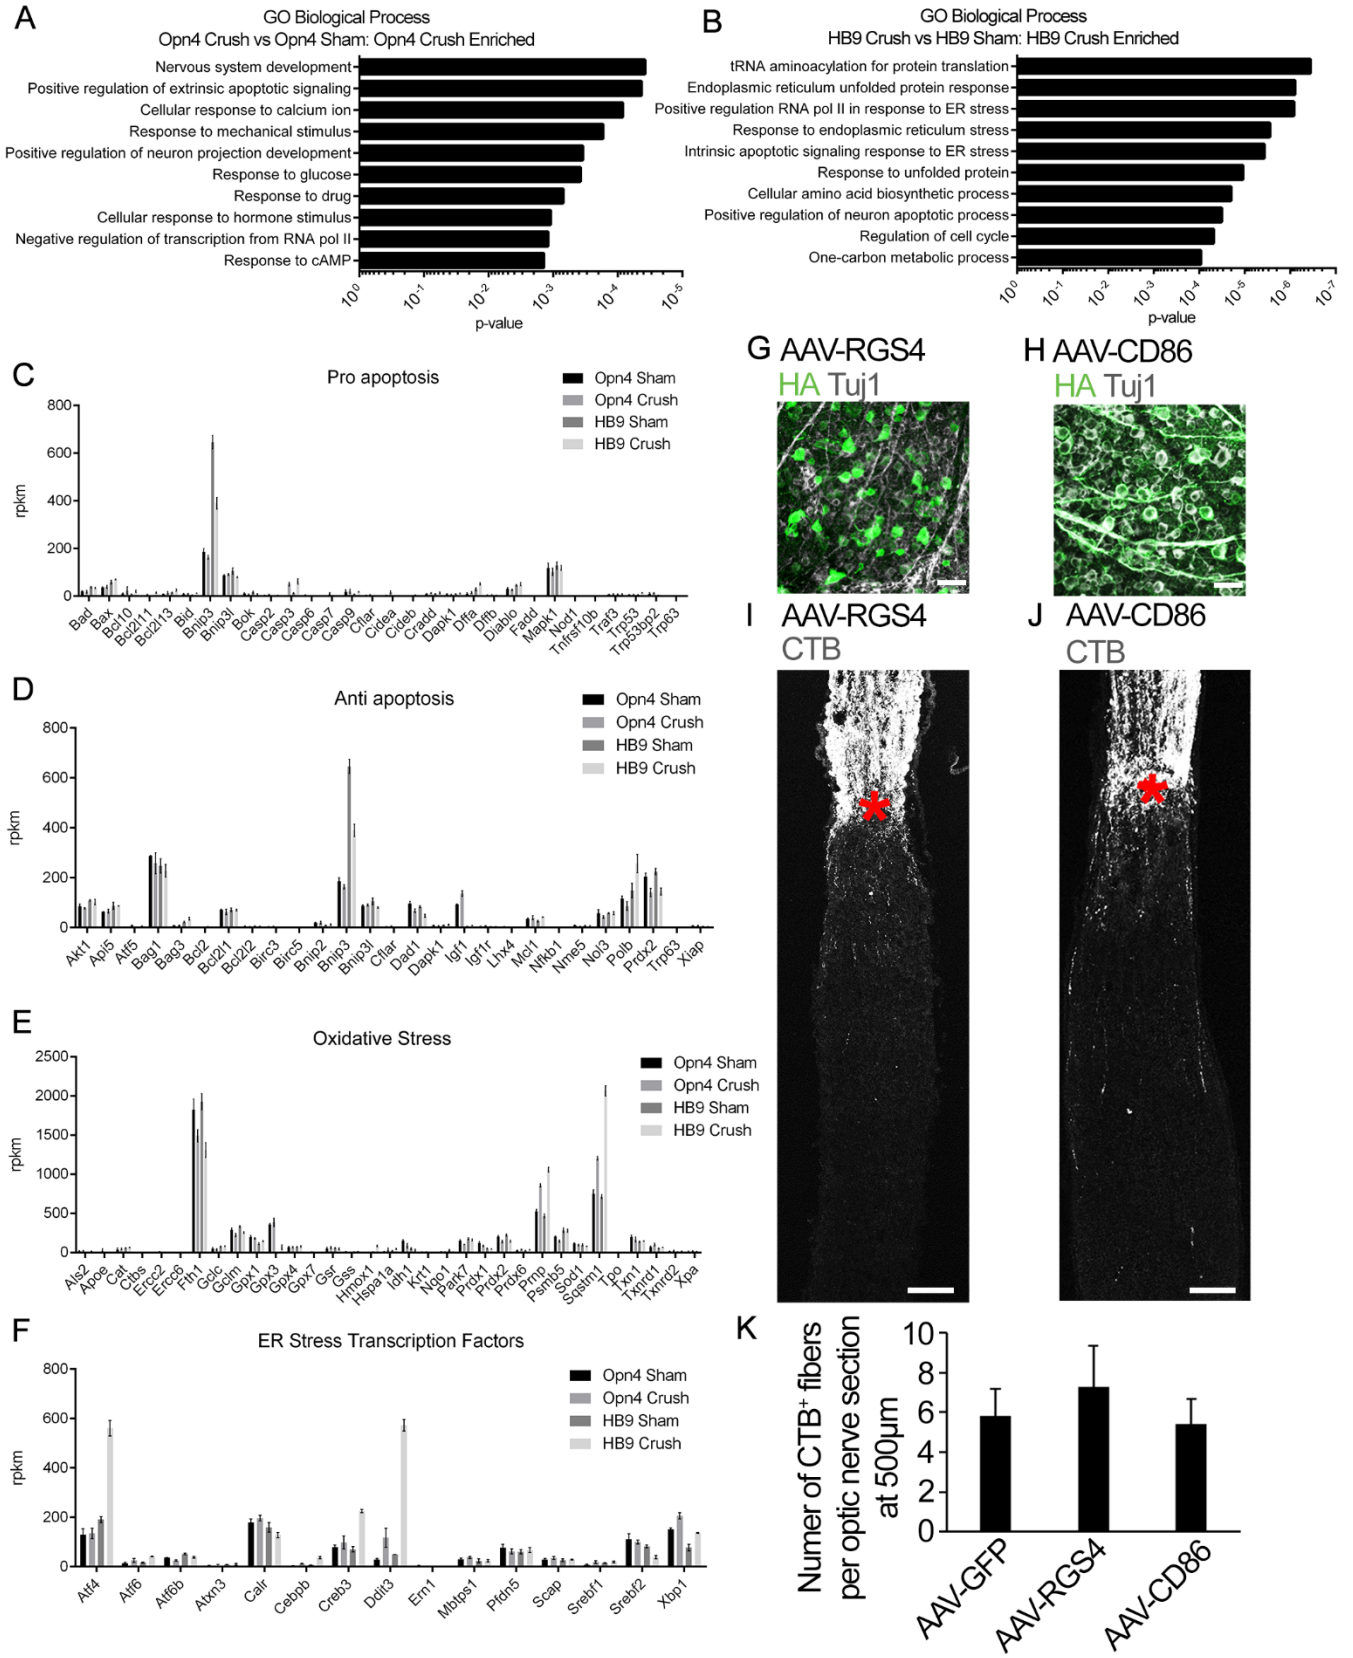

**Supplementary Figure 5 (Related to Figure 4): Pathway and gene set analyses, and in vivo examination of effects of overexpressing select candidate genes. (A and B)** Top 10 GO biological processes enriched for each comparison as stated in graph title. Enriched genes defined as  $\pm 1 \log_2FC$  and adjusted (adj) p-value  $\leq 0.05$ . **(C-F)** Average expression of genes associated with (C) pro-apoptosis, (D) anti-apoptosis, (E) ameliorating oxidative stress and (F) ER stress transcription factors. Error bars, SEM. **(G and H)** Representative retinas of (G) AAV2-RGS4-HA and (H) AAV2-CD86-HA injected C57BL/6J mice after immunostaining using Tuj1 and HA antibodies. Retinas were removed 2 weeks after intravitreal AAV injection. Scale bar, 25  $\mu\text{m}$ . **(I and J)** Representative images of optic nerve sections showing CTB-labeled axons 3 weeks post crush (wpc). C57BL/6J mice received an intravitreal injection of either (I) AAV2-RGS4-HA or (J) AAV2-CD86-HA at 2 weeks prior to crush. Asterisk, lesion site. Scale bar, 100  $\mu\text{m}$ . **(K)** Quantification of axon regeneration for (I and J). The number of CTB<sup>+</sup> axons at 500  $\mu\text{m}$  distal to the lesion site.  $n=7$  for AAV-RGS4, 5 for AAV-CD86, 5 for AAV-GFP.

**Figure S6**

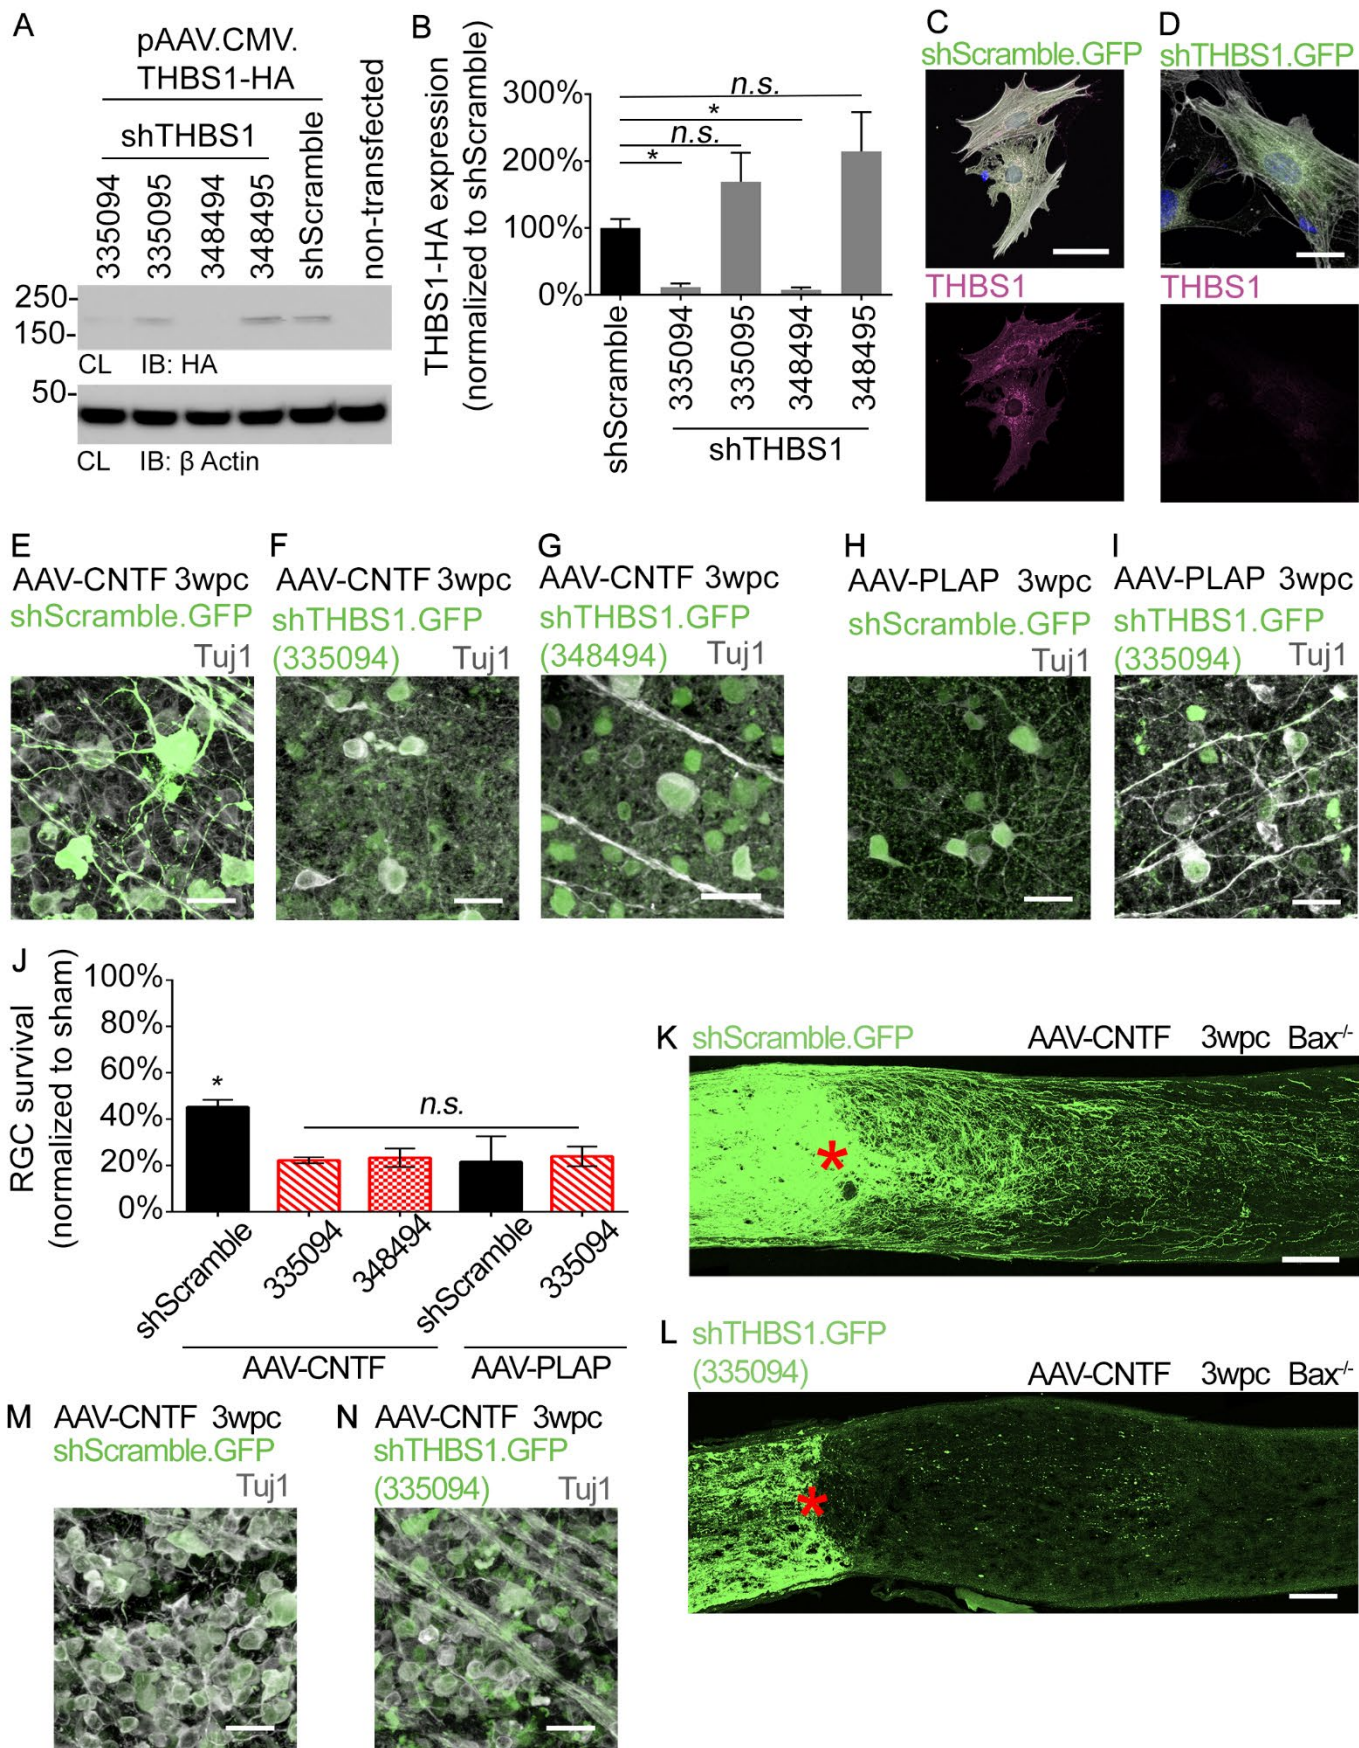



**Supplementary Figure 6 (Related to Figure 6): Validation of THBS1 knock-down and additional RGC survival and regeneration data from the THBS1-knockdown experiment.** (A) HEK293T cells were co-transfected with AAV-THBS1-HA and shRNA containing plasmid. Cell lysate (CL) of HEK293T cells immunoblotted (IB) for HA and  $\beta$ -Actin. shTHBS1 identifiers are the last six digits of Broad Institutes TCRN identifier. (B) Densitometry quantification of (A). Each sample normalized to  $\beta$ -Actin. Error bars, SEM. \*  $p < 0.05$ , *n.s.*  $p \geq 0.05$ ,  $n=4$  each condition, ANOVA with Bonferroni post-hoc vs shScramble. (C and D) Mouse embryonic fibroblasts nucleofected with shRNA-GFP plasmids. Immunocytochemistry for GFP (green), Phalloidin (grey), Hoechst (blue) and THBS1 (magenta). Top panels, merged images showing all colors. Bottom panels, images showing THBS1 immunoreactivity only. (C) shScramble-treated cells. (D) shTHBS1 335094-treated cells. Scale bars, 50  $\mu\text{m}$ . (E-I) Retinas showing Tuj1 (grey) and AAV-shRNA.GFP (shScramble or shTHBS1) infected GFP-labeled RGCs (green). (E, F and G) AAV-CNTF injected mice 3 weeks post crush (wpc). (H and I) AAV-PLAP injected mice 3wpc. Scale bar, 25  $\mu\text{m}$ . (J) Quantification of RGC survival for (E-I). \*  $p < 0.05$  AAV-CNTF + shScramble vs all others, *n.s.*  $p \geq 0.05$  all other comparisons, ANOVA, Tukey's post-hoc test. Error bars, SEM. (K and L) Optic nerves showing AAV-shRNA.GFP infected GFP-labeled RGC axons (green) in  $Bax^{-/-}$  mice 3 weeks after crush and AAV-CNTF. (K) AAV-shScramble.GFP animal, (L) AAV-shTHBS1(335094).GFP animal. Scale bars, 100  $\mu\text{m}$ . (M and N) Retinas showing Tuj1 (grey) and AAV-shRNA.GFP infected GFP-labeled RGCs (green) in  $Bax^{-/-}$  mice 3 weeks after crush and AAV-CNTF. (M) AAV-shScramble.GFP animal, (N) AAV-shTHBS1(335094).GFP animal. Scale bars, 25  $\mu\text{m}$ .

# Figure S7

**A** GLT1<sup>eGFP/+</sup> Thbs1 Dapi Sham (Uninjured)

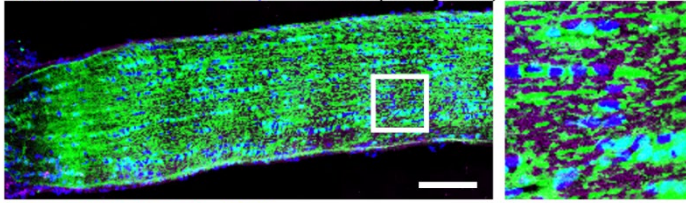

**B** GLT1<sup>eGFP/+</sup> Thbs1 Dapi 7dpc

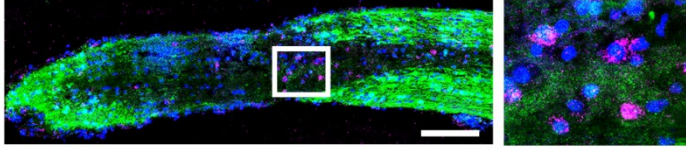

**C** CTB AAV-VTN 3wpc

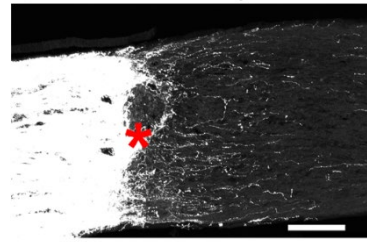

**D** AAV-VTN 3wpc

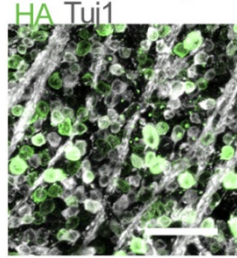

**E** CTB AAV-Cre 2wpc Atf6<sup>ff</sup>

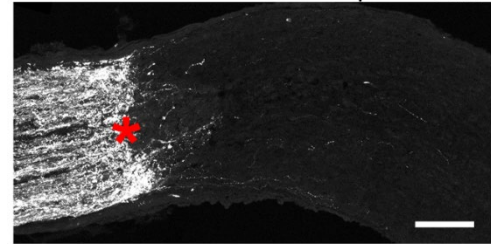

**F** CTB AAV-GFP 2wpc Atf6<sup>ff</sup>

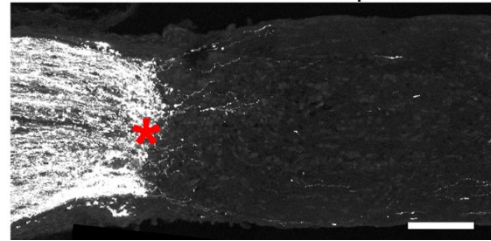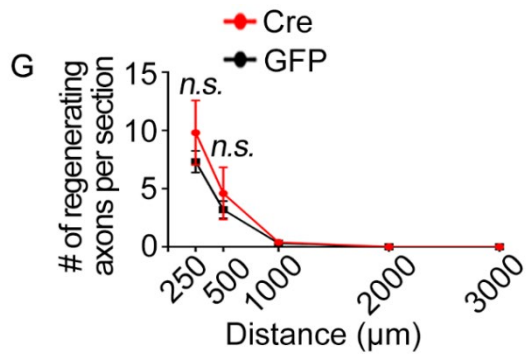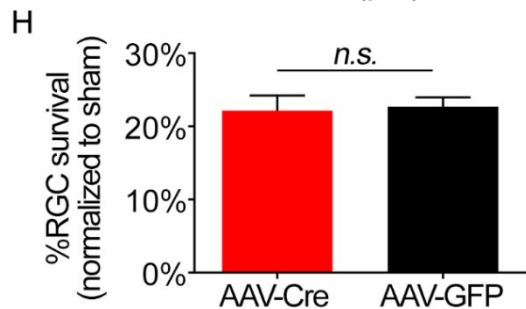

**I** CTB AAV-Cre AAV-CNTF 3wpc Atf6<sup>ff</sup>

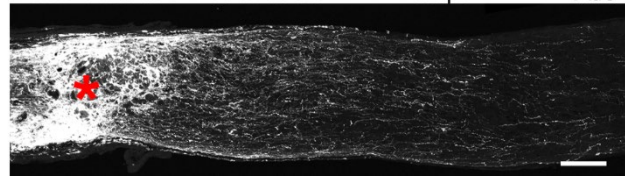

**J** CTB AAV-GFP AAV-CNTF 3wpc Atf6<sup>ff</sup>

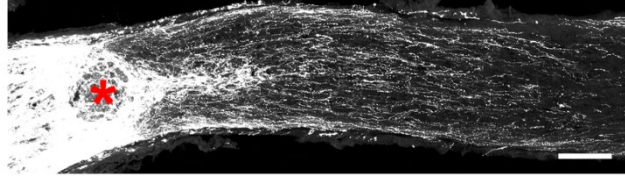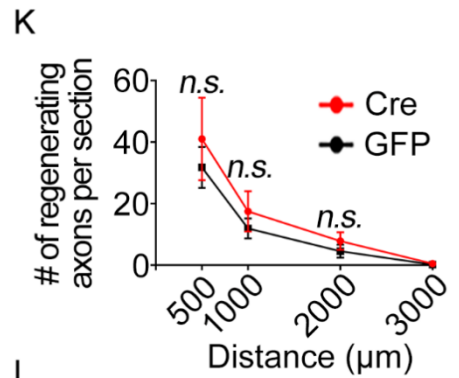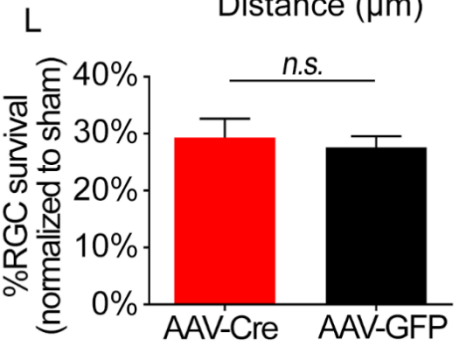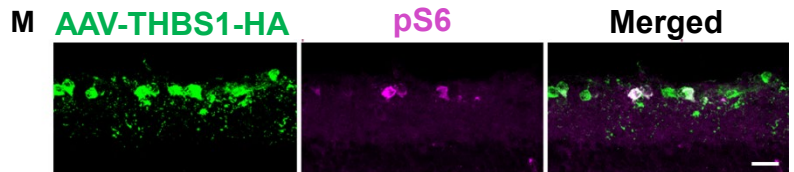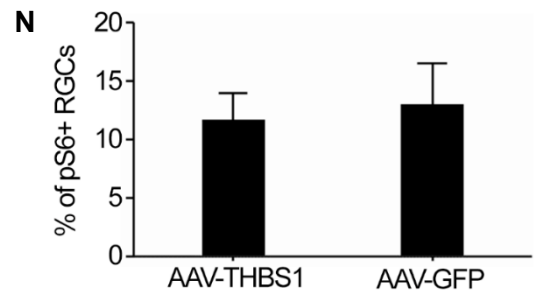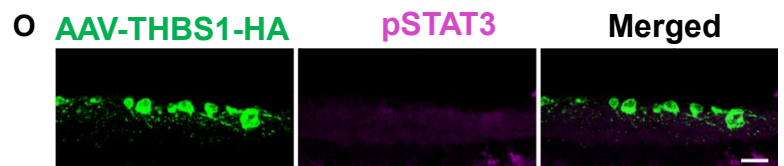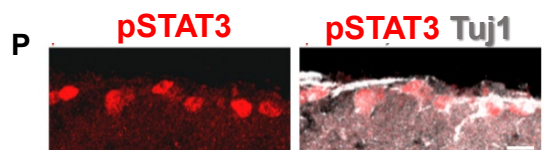

**Supplementary Figure 7 (Related to Figure 7): Examination of THBS1's potential downstream mechanism: ATF6 (a known intracellular effector of THBS1), pS6 and pSTAT3.** (A) Uninjured optic nerve of adult *GLT1-eGFP* mouse (a glial cell-reporter mouse) subjected to FISH staining. *Thbs1* in magenta; GFP in green; Dapi in blue. Right image shows higher magnification of the boxed region on the left. (B) Crushed optic nerve of adult *GLT1-eGFP* mouse. The regions that are devoid of GFP<sup>+</sup> cells indicate the lesion site. *Thbs1* in magenta; GFP in green; Dapi in blue. Scale bar, 100  $\mu$ m. (C) Representative optic nerve of an AAV-vitronectin (VTN)-HA injected mouse. AAV-VTN was injected 2 weeks before crush. wpc, weeks post crush. Scale bar, 100  $\mu$ m. (D) Whole-mount retina from an AAV-VTN-HA injected mouse stained with HA and Tuj1 antibodies. Retina was removed 2 weeks after AAV injection to validate VTN-HA expression. Scale bar, 100  $\mu$ m. (E and F) Optic nerves showing CTB-labeled axons (grey) from *Atf6<sup>ff</sup>* mice. (E) AAV-Cre injected animal 2 weeks after crush, (F) AAV-GFP injected animal. (G) Quantification of axon regeneration for (E and F). (H) Quantification of RGC survival for (E and F). Percentage of Tuj1<sup>+</sup> RGCs in each group normalized to the sham uninjured retina. (I) AAV-Cre + AAV-CNTF injected *Atf6<sup>ff</sup>* animal 3 weeks post crush, and (J) AAV-GFP + AAV-CNTF injected *Atf6<sup>ff</sup>* animal. Asterisks, lesion site. Scale bars, 100  $\mu$ m. (K) Quantification of axon regeneration for (I and J). (L) Quantification of RGC survival for (I and J). Percentage of Tuj1<sup>+</sup> RGCs in each group normalized to the sham uninjured retina. *n.s.*  $p \geq 0.05$ , 2 tailed unpaired *t*-test at each distance. Error bars, SEM.  $n = 6$  for AAV-Cre + 2 week post crush, 5 for AAV-GFP + 2 week post crush, 6 for both AAV-CNTF 3wpc groups.

(M) Images of retina sections (3 days post crush) from mice injected with AAV-THBS1-HA, co-stained against pS6 (magenta). HA in green. Scale bar, 25  $\mu$ m. (N) Quantification of percentage of pS6<sup>+</sup> RGCs per retina in AAV-THBS1 and AAV-GFP (control) animal groups.  $n = 3$  per condition. Error bars, SEM. (O) Images of retina sections (3 days post crush) from mice injected with AAV-THBS1-HA, co-stained against pSTAT3 (magenta). Scale bar, 25  $\mu$ m. (P) Validation of the pSTAT3 antibody. To ensure that the lack of pSTAT3<sup>+</sup> RGCs seen after AAV-THBS1 injection is not due to staining issue, we performed the immunostaining using the same protocol on retinal sections from a mouse subjected to intravitreal AAV-CNTF injection, known to activate STAT3 in injured RGCs. pSTAT3 in red Tuj1 in grey.



**Figure S8**

**A**

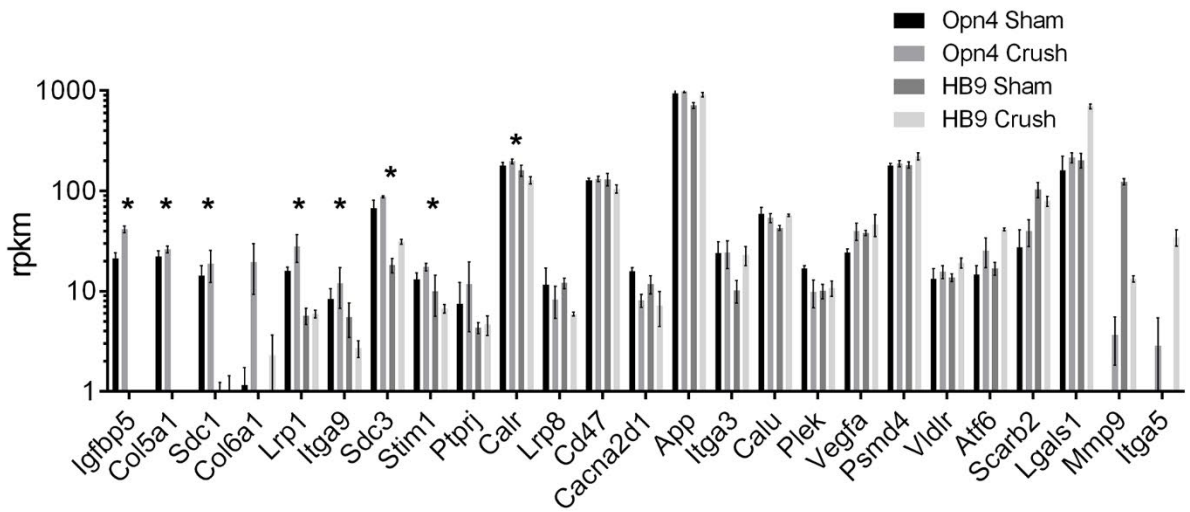

**B**

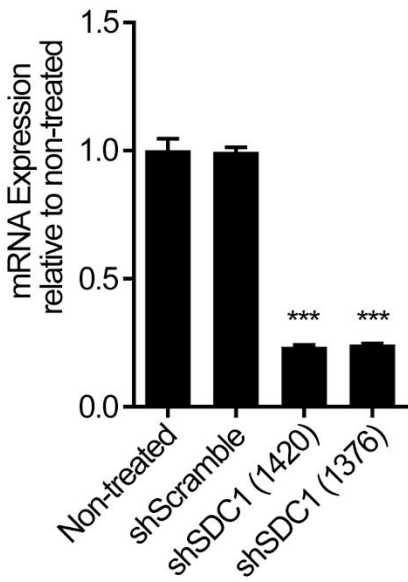

**C** CTB AAV-shSDC1 3wpc C57BL/6J

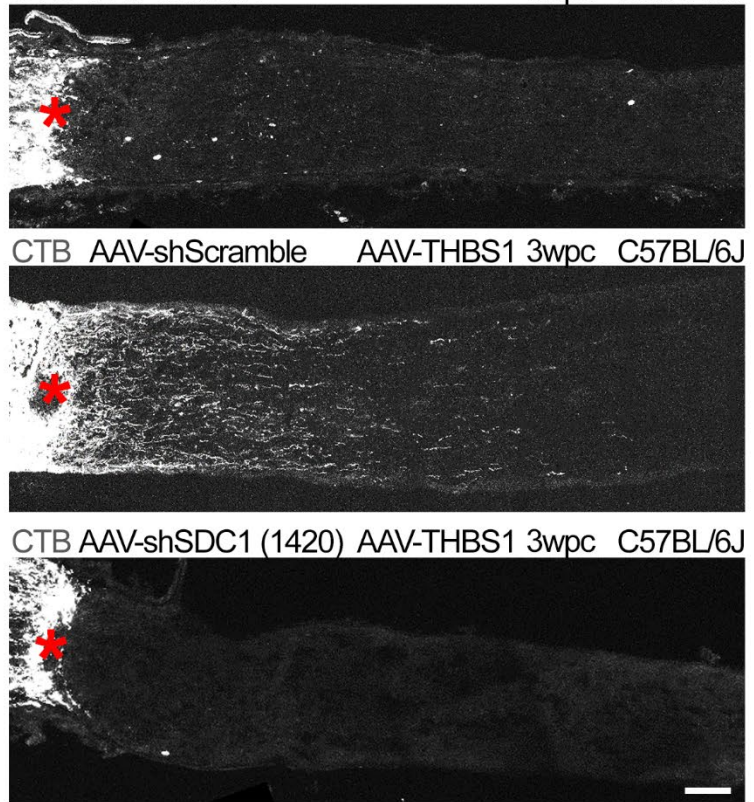

**D**

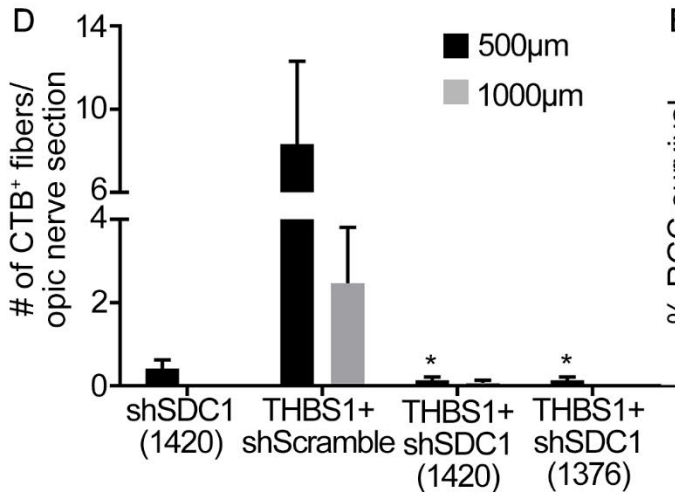

**E**

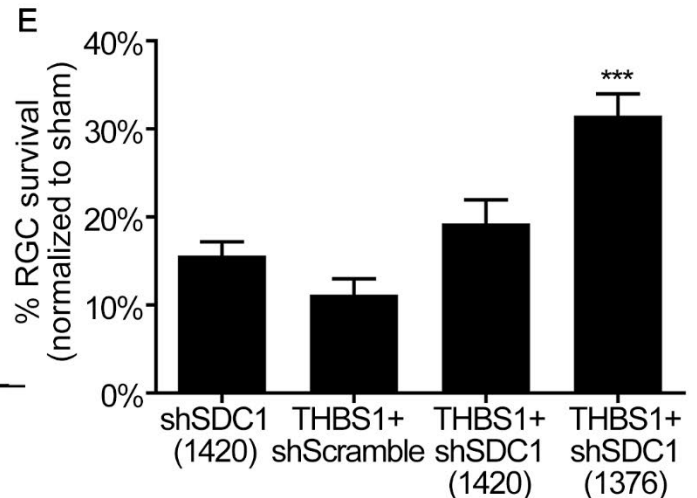

**Supplementary Figure 8 (Related to Figures): Syndecan-1 is highly expressed in Opn4 but not in HB9 RGCs: THBS1 induced- and spontaneous RGC axon regeneration require syndecan-1.** (A) Graph showing the expression levels of genes known to bind to THBS1 in Opn4 and HB9 RGCs with (crush) or without (sham) optic nerve crush. Genes were included if geometric mean expression was greater than 10 RPKM in Opn4 Crush or HB9 Crush condition. \* *FDR adjusted p-value*  $\leq 0.05$ . (B) Validation of two different shRNAs against syndecan-1. shRNA-GFP plasmids encoding control (shScramble) or syndecan-1-targeting shRNAs (shSDC1) were validated in Neuro-2a cells. shSDC1 (1420), shRNA targeting mRNA nucleotide position 1420-1439; shSDC1 (1376), shRNA targeting mRNA nucleotide position 1376-1396. Values are presented relative to the syndecan-1 expression in non-treated cells (n=3; mean  $\pm$  sd). \*\*\* *p* < 0.0001, ANOVA, Bonferroni's post hoc vs shScramble. (C) Representative optic nerve sections from animals subjected to either AAV-shSDC1 alone, AAV-THBS1 + AAV-shScramble or AAV-THBS1 + AAV-shSDC1. Animals (C57BL/6J) received co-injection of the AAVs followed by crush 2 weeks later. Regeneration was analyzed about 2 weeks after crush. Asterisks, lesion site. Scale bar, 100  $\mu$ m. (D) Quantification of axon regeneration for (C). The number of CTB<sup>+</sup> fibers at each distance distal to the lesion site. n=4 for AAV-shSDC1 (1420), 5 for AAV-THBS1 + AAV-shScramble, AAV-THBS1 + AAV-shSDC1 (1420) and AAV-THBS1 + AAV-shSDC1 (1376). ANOVA with Bonferroni post-hoc vs THBS1 + shScramble. \* *p* < 0.05; Error bars, SEM. (E) Quantification of RGC survival for (C and D). Percentage of Tuj1<sup>+</sup> RGCs in each group normalized to the sham uninjured retinas. ANOVA with Bonferroni post-hoc vs THBS1 + shScramble. \*\*\* *p* < 0.001; Error bars, SEM.

Table S1. qPCR Primers (Related to Figures 1, 3 and S8)

| Gene Symbol | Ref-seq ID<br>(one isoform) | Forward (5' -> 3')     | Reverse (5' -> 3')     |
|-------------|-----------------------------|------------------------|------------------------|
| Gapdh       | NM_008084.3                 | CAAAATGGTGAAGGTCGGTGTG | TGATGTTAGTGGGGTCTCGCTC |
| Opn4        | NM_013887.2                 | TGGTGATCACACGTCCACTG   | GCACGTAGGCACTCCAACC    |
| Tbr2        | NM_010136.3                 | CAGGGTTCTCCGCTCTACGG   | CATGCGCCTGCCCTGTTTG    |
| Rho         | NM_145383.1                 | GCCACCACTCAGAAGGCAG    | GATGGAAGAGCTCTTAGCAAAG |
| cJun        | NM_010591.2                 | CCTTCTACGACGATGCCCTC   | GGTTCAAGGTCATGCTCTGTTT |
| Cartpt      | NM_013732.7                 | ACGAGAAGGAGCTGATCGAAG  | CAGTCACACAGCTTCCCGAT   |
| Atf3        | NM_007498.3                 | AACTGGCTTCCTGTGCACTT   | TGAGGCCAGCTAGGTCATCT   |
| Thbs1       | NM_011580.4                 | AGTGAAGAGCATCACGCTG    | CACCACGTTGTTGTCAAGGG   |
| sdc1        | NM_011519.2                 | ATGAGACGCGCGGCGCTCTG   | GCGTAGAACTCCTCCTGCTTGG |
|             |                             |                        |                        |



Table S2. Cloning Primers (Related to Figures 5, 6, 7 and S7 and S8)

| Table 2: Cloning primers and oligonucleotides |                                                            |                            |
|-----------------------------------------------|------------------------------------------------------------|----------------------------|
|                                               |                                                            |                            |
| <b>shRNA backbone primers</b>                 | <b>Primer (5'-&gt; 3')</b>                                 | <b>Introduced Cut Site</b> |
| CMV_mutant F                                  | tcgatCAATTGtcgccaccatggtgagcaa                             | MfeI                       |
| CMV_mutant R                                  | tcgatCTCGAGaggcggggagggcg                                  | XhoI                       |
| MluI-U6 F                                     | tcgatACGCGTAGAGAGGGCCTATTTCCCATGA                          | MluI                       |
| MluI-U6 R                                     | tcgatACGCGTAGATCTAGAATTCAAAAATGAAACCGA                     | MluI                       |
|                                               |                                                            |                            |
| <b>shRNA oligonucleotides</b>                 | <b>Oligonucleotide</b>                                     |                            |
| shThbs1 (TCRN0000335094) (+)                  | CCGGGCTGGAAAGATTTCACTGCATCTCGAGATGCAGTGAATCTTTCCAGCTTTTTG  |                            |
| shThbs1 (TCRN0000335094) (-)                  | AATTCAAAAAGCTGGAAAGATTTCACTGCATCTCGAGATGCAGTGAATCTTTCCAGC  |                            |
| shThbs1 (TCRN0000335095) (+)                  | CCGGGCGCCTATTTACTTCCCACTACTCGAGTAGTGGGAAGTAAATAGGCGCTTTTTG |                            |
| shThbs1 (TCRN0000335095) (-)                  | AATTCAAAAAGCGCCTATTTACTTCCCACTACTCGAGTAGTGGGAAGTAAATAGGCGC |                            |
| shThbs1 (TCRN0000348494) (+)                  | CCGGTGAACCGATTTCGACAATTCTCGAGAATTGTCGGAAATCGGTTTCATTTTG    |                            |
| shThbs1 (TCRN0000348494) (-)                  | AATTCAAAAATGAAACCGATTTCGACAATTCTCGAGAATTGTCGGAAATCGGTTTCA  |                            |
| shThbs1 (TCRN0000348495) (+)                  | CCGATCATCAGCTGCCAATCATAACTCGAGTTATGATTGGCAGCTGATGATTTTTG   |                            |
| shThbs1 (TCRN0000348495) (-)                  | AATTCAAAAATCATCAGCTGCCAATCATAACTCGAGTTATGATTGGCAGCTGATGAT  |                            |
| shScramble (+)                                | CCGGCAACAAGATGAAGAGCACCAACTCGAGTTGGTGCTCTTCATCTTGTGTTTTG   |                            |
| shScramble (-)                                | AATTCAAAAACAACAAGATGAAGAGCACCAACTCGAGTTGGTGCTCTTCATCTTGTG  |                            |
| shSdc1-1420 (+)                               | CCGGTCCACACCTGTCGTCCACTCTTCAAGAGAGAGTGGACGACAGGTGTGTTTTTTG |                            |
| shSdc1-1420 (-)                               | AATTCAAAAACCACACCTGTCGTCCACTCTCTTGAAGAGTGGACGACAGGTGTGGA   |                            |
| shSdc1-1376 (+)                               | CCGGGCTTGGGTGCAAAGGGTTTCTCGAAAGAAACCCCTTTCACCCAAGCTTTTTG   |                            |
| shSdc1-1376 (-)                               | AATTCAAAAAGCTTGGGTGCAAAGGGTTTCTTCGAGAAACCCCTTTCACCCAAGC    |                            |
|                                               |                                                            |                            |
| <b>pscAAV.CMV.SV40.mcs oligonucleotides</b>   | <b>Oligonucleotide</b>                                     |                            |
| Oligo_SV40_mcs (+)                            | GATCCTCTAGAGTCGACCTGCAGAAGCTTGCCTCGAGCAGCGCTGCTCGAGAGATCTA |                            |
| Oligo_SV40_mcs (-)                            | GGCCTAGATCTCTCGAGCAGCGCTGCTCGAGGCAAGCTTCTGCAGGTCGACTCTAGAG |                            |
|                                               |                                                            |                            |
| <b>pAAV.CMV.SV40 backbone primers</b>         | <b>Primer (5'-&gt; 3')</b>                                 | <b>Introduced Cut Site</b> |
| NotI_SV40 F                                   | tcgatGCGGCCGCTCGTGACCTAGGCATATGCCAAG                       | NotI                       |
| NotI_SV40 R                                   | tcgatGCGGCCGAGTTTAAAAACCTCCACACCT                          | NotI                       |

Table S2. continued

| <b>Thbs1</b>                         | <b>Primer (5'→ 3')</b>                                               | <b>Introduced Cut Site</b> |
|--------------------------------------|----------------------------------------------------------------------|----------------------------|
| Thbs1-TSS F                          | tcgatAAGCTTatgaccatgGAGCTCCTGCGGGGACTA                               | HindIII                    |
| Thbs1-HA R                           | gctacCTCGAGTTAagcgtaatctggaacatcgatgggtaGGAATCTCGACACTCGTATTT<br>CAT | XhoI                       |
|                                      |                                                                      |                            |
| <b>pAAV.CMV.C-HA</b>                 | <b>Oligonucleotide</b>                                               |                            |
| Oligo_C-HA (+)                       | agcttaccatacagatgtccagattacgcttag                                    |                            |
| Oligo_C-HA (-)                       | gatcctaagcgtaatctggaacatcgatgggta                                    |                            |
|                                      |                                                                      |                            |
| <b>Thbs1 truncation mutants</b>      | <b>Primer (5'→ 3')</b>                                               |                            |
| Thbs1-T3-8 R                         | gcactgatgtcaaaattctcaggacagat                                        |                            |
| Thbs1-EGFL1-3 R                      | Gcgcagatgatgccattgcctgca                                             |                            |
|                                      |                                                                      |                            |
| <b>Thbs1-ΔTSR1</b>                   | <b>Primer (5'→ 3')</b>                                               |                            |
| TSR1                                 | atggagctcctgcggggac                                                  |                            |
| TSR2                                 | ggaatctcgacactcgtattcatgtctg                                         |                            |
| TSR3                                 | ctctgctgacgatggcattgatggatgcctgtccaatccct                            |                            |
| TSR4                                 | ggacaggcatccatcaatgccatcgtcagcagagtgc                                |                            |
|                                      |                                                                      |                            |
| <b>Thbs1-ΔCC</b>                     | <b>Primer (5'→ 3')</b>                                               |                            |
| CC1                                  | GCTGTGGAACGGAAGACAACA                                                |                            |
| CC2                                  | AACAGGACGACCATGGAGAC                                                 |                            |
| CC3                                  | GGCCTCTCTGTCTCCCTCTGCTTTCACAATGG                                     |                            |
| CC4                                  | CAGAGGGGAGGACAGGAGAGGCCACAGATAGC                                     |                            |
|                                      |                                                                      |                            |
| <b>Thbs4</b>                         | <b>Primer (5'→ 3')</b>                                               |                            |
| Thbs4-F                              | GAGTCACCATGCCGGCCCCA                                                 |                            |
| Thbs4-R                              | TTATCCAAGCGGTGAAACTCTGG                                              |                            |
|                                      |                                                                      |                            |
| <b>Bcl2</b>                          | <b>Primer (5'→ 3')</b>                                               |                            |
| Bcl2-F                               | GATGGCGCAAGCCGGGAGAA                                                 |                            |
| Bcl2-R                               | GCCTTGTGGCCAGGTATGCACC                                               |                            |
|                                      |                                                                      |                            |
| <b>Vitronectin</b>                   | <b>Primer (5'→ 3')</b>                                               |                            |
| Vtn-F                                | ATGGCACCCCTGAGGCCCTTTTTCATACTAGCCCTG                                 |                            |
| Vtn-R                                | TTCTCAGAGGTCGGGCAGCC                                                 |                            |
|                                      |                                                                      |                            |
| <b>Cd86</b>                          | <b>Primer (5'→ 3')</b>                                               |                            |
| Cd86-F                               | ACCCACGATGGACCCCA                                                    |                            |
| Cd86-R                               | TCTGCATTTGGTTTTGCTGAAGC                                              |                            |
|                                      |                                                                      |                            |
| <b>RGS4</b>                          | <b>Primer (5'→ 3')</b>                                               |                            |
| RGS4-F                               | atgtgcaaaggactgcaggtctgccg                                           |                            |
| RGS4-R                               | gcacactgggagaccaggaagtgcagtct                                        |                            |
|                                      |                                                                      |                            |
| <b>Syndecan 1</b>                    | <b>Primer (5'→ 3')</b>                                               |                            |
| Sdc1-F                               | ATGAGACGCGCGCGCTCTG                                                  |                            |
| Sdc1-R                               | GCGTAGAACTCCTCCTGCTTGG                                               |                            |
|                                      |                                                                      |                            |
| <b>pAAV.GFAP.Thbs1-HA.SV40-polyA</b> | <b>Primer (5'→ 3')</b>                                               | <b>Introduced Cut Site</b> |
| GFAP-F                               | CTGAGCTAGCAACATATCCTGGTGTGGAGT                                       | NheI                       |
| GFAP-R                               | CATATCCGGACCCCGCAGCAGCGGAGGTGATGCGT                                  | BspEI                      |
| <b>pAAV.GFAP.EGFP.SV40-polyA</b>     | <b>Primer (5'→ 3')</b>                                               | <b>Introduced Cut Site</b> |
| EGFP-F                               | CATGAAGCTTATGGTGAACAAGGGCAGGA                                        | HindIII                    |
| EGFP-R                               | CATGCTCGAGTTACTTGTACAGCTCGTCCATGCCGAGAGTGATCCCG                      | XhoI                       |
|                                      |                                                                      |                            |
|                                      |                                                                      |                            |
| <b>Sanger Sequencing Primers</b>     |                                                                      |                            |
| <b>Primer Name</b>                   | <b>Primer (5' → 3')</b>                                              |                            |
| U6 F                                 | CGCGTAGAGAGGGCTATTT                                                  |                            |
| CMV R                                | tacacgcctaccgcca                                                     |                            |
| Thbs1_seq_1 F                        | ACCAACGTCCTTCTTACCCTTGA                                              |                            |
| Thbs1_seq_2 F                        | TCACCATGGGACATCTGCTCT                                                |                            |
| Thbs1_seq_3 F                        | TCCATTACAACCCAGCCAGT                                                 |                            |
| Thbs1_seq_4 F                        | TGACCCTGGACTTGCTGTAGGT                                               |                            |
|                                      |                                                                      |                            |
